# Supplementary material for: Systematic structure control of ammonium iodide salts as feasible UCST-type forward osmosis draw solutes for the treatment of wastewater
Source: Royal Society of Chemistry journal article supplement (doi:10.1039/c7ta09741g), 2017-12-11
Supplement: c7ta09741g1.pdf [file c7ta09741g1.pdf]

## Electronic Supplementary Information for:

# Systematic Structure Control of Ammonium Iodide Salts as Feasible UCST-type Forward Osmosis Draw Solutes for the Treatment of Wastewater

5 Authors: Jeongseon Park, Heeyoung Joo, Minwoo Noh, Yon Namkoong, Seonju Lee, Kyung Hwa Jung, Hye Ryun Ahn, Seulah Kim, Jong-Chan Lee, Jae Hoon Yoon and Yan Lee\*

### Table of contents:

10 **Figure S1.** Synthetic scheme and  $^1\text{H}$  NMR spectra of a) 3MBAI, b) 3MOAI, c) 3PEAI, d) HM2I, e) HM4I. f) Synthetic scheme and  $^1\text{H}$  NMR spectra of *N,N,N',N'*-tetramethyl-1,6-diaminohexane and HM6I, and g)  $^{13}\text{C}$  NMR spectra of *N,N,N',N'*-tetramethyl-1,6-diaminohexane and HM6I. h) Synthetic scheme and  $^1\text{H}$  NMR spectra of 1,8-diaminooctane and HM8I, and i)  $^{13}\text{C}$  NMR spectra of 1,8-diaminooctane and HM8I. j) Synthetic scheme and  $^1\text{H}$  NMR spectra of HE2I.

**Table S1.** Amounts of reagents used for the synthesis of the ammonium iodide salts.

15 **Figure S2.** Schematic illustration of a) handmade U-shaped glass tubes for small-scale analysis (dead-end type) and b) a cross-flow instrument for large-scale analysis.

20 **Figure S3.** a)  $^1\text{H}$  NMR spectra of HM10I before and after stability test. b) LC/MS spectra of HM10I before and after stability test. c) The UCST phase transition of aqueous solution of 40 wt% HM10I (initial (●, solid line) and after stability test (Δ, dash line)). d) Viability of HeLa cells treated with HM8I (●, solid line) and HM10I (Δ, dotted line). Each data point represents the average value of five experiments ( $\pm$ S.D.).

a)

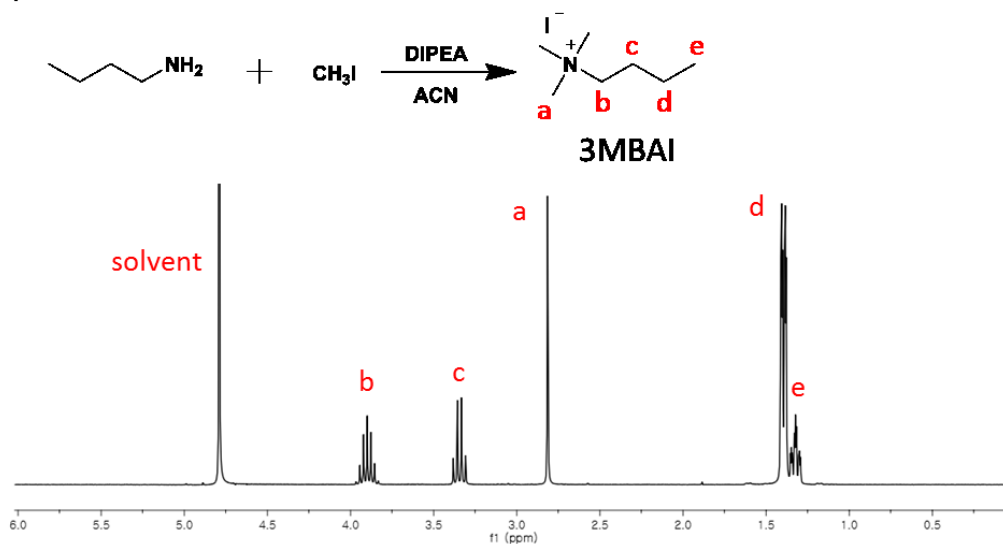

b)

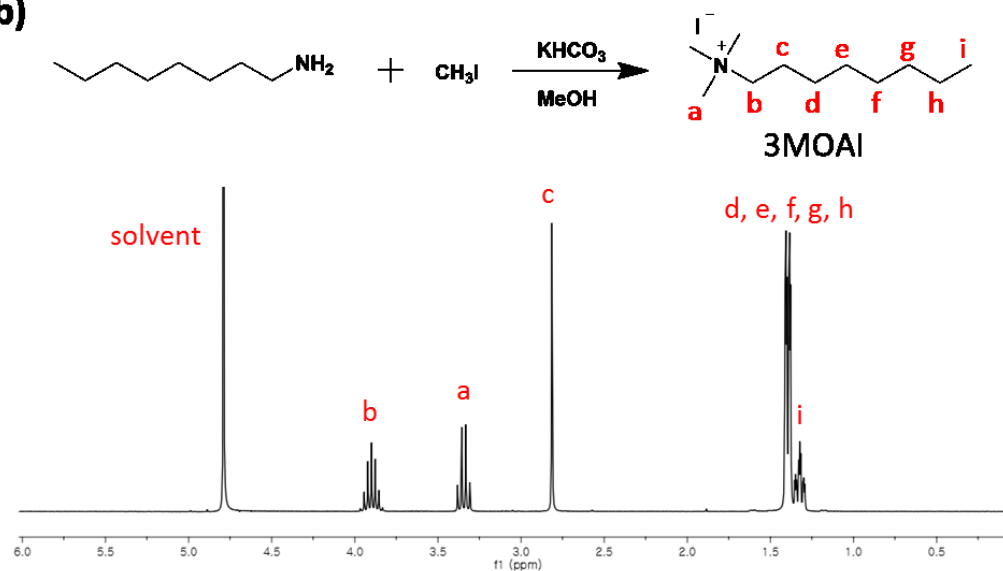

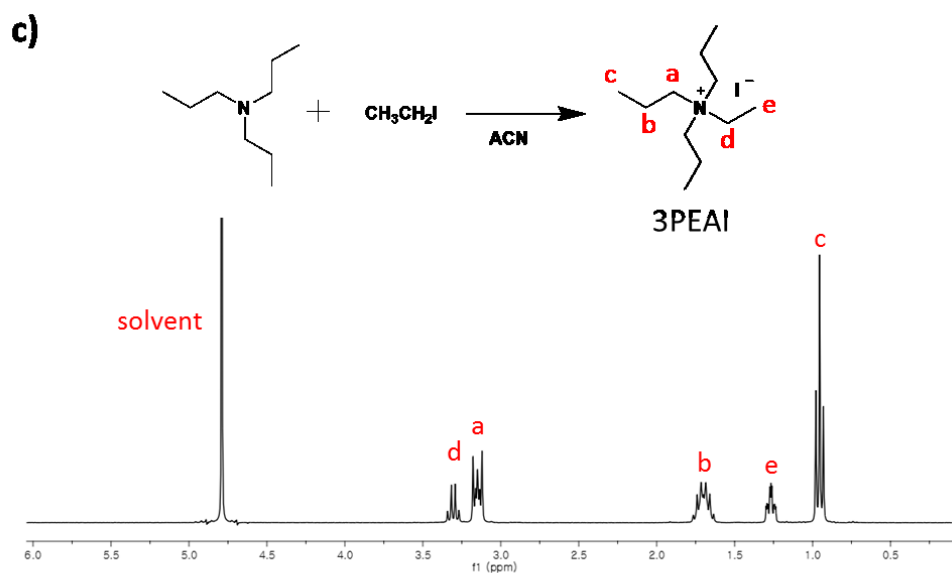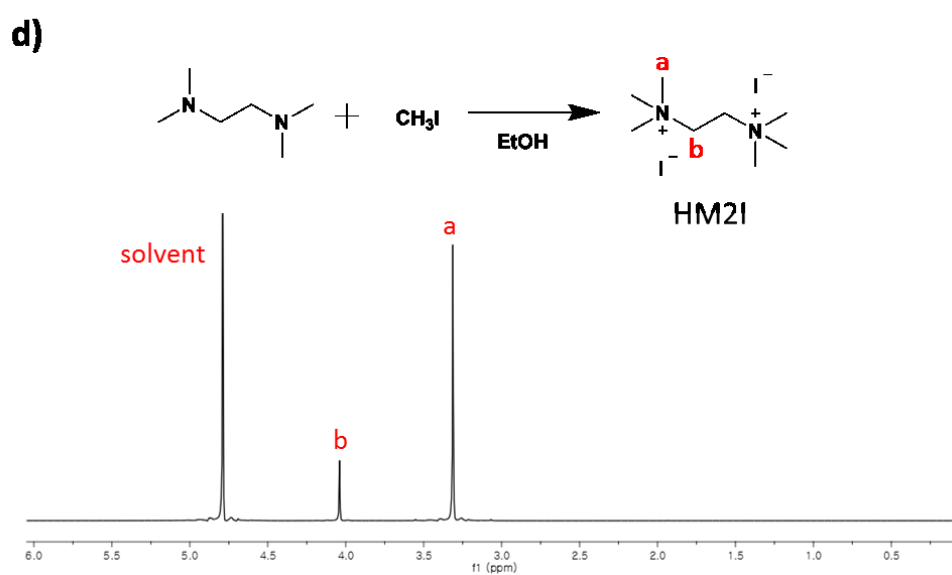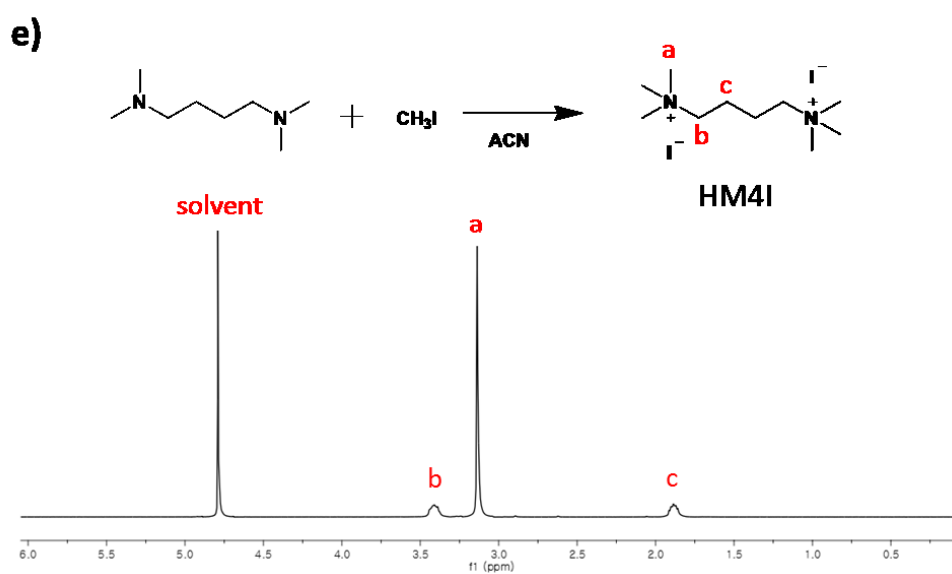

f)

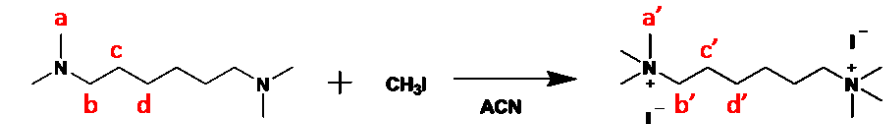

*N,N,N',N'*-Tetramethyl  
-1,6-diaminohexane

HM6I

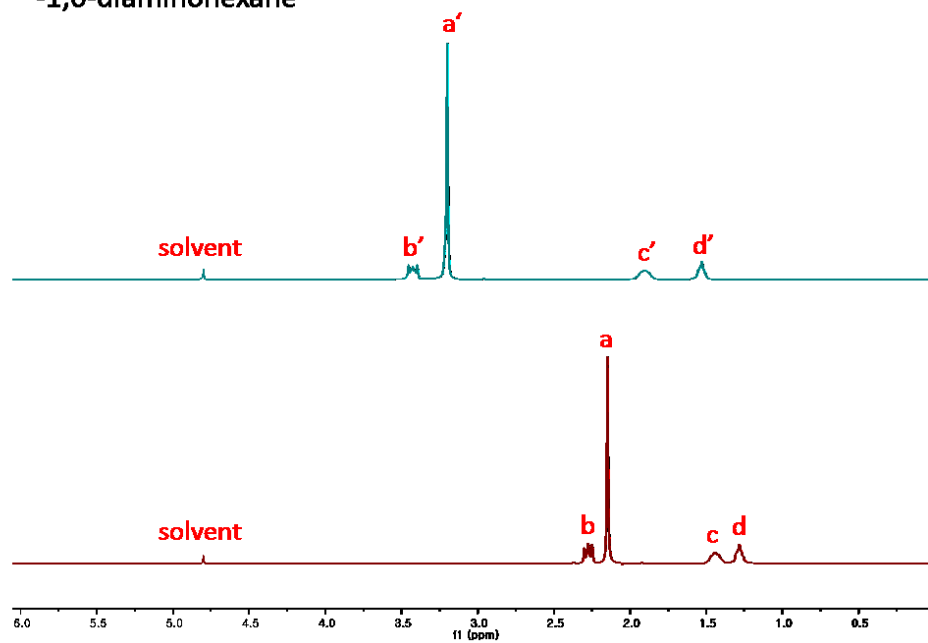

g)

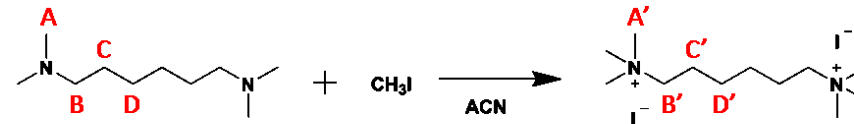

*N,N,N',N'*-Tetramethyl  
-1,6-diaminohexane

HM6I

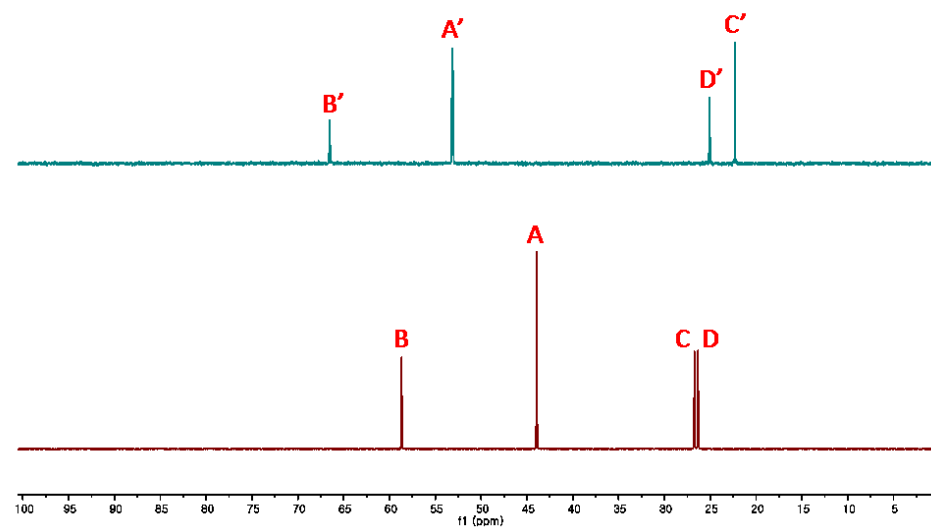

h)

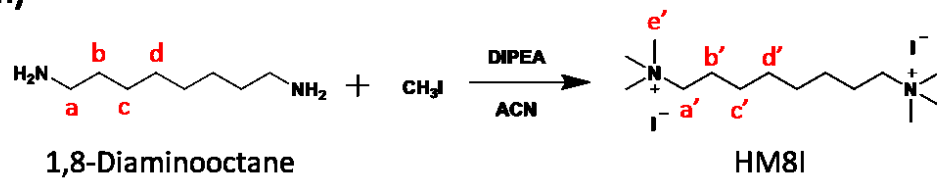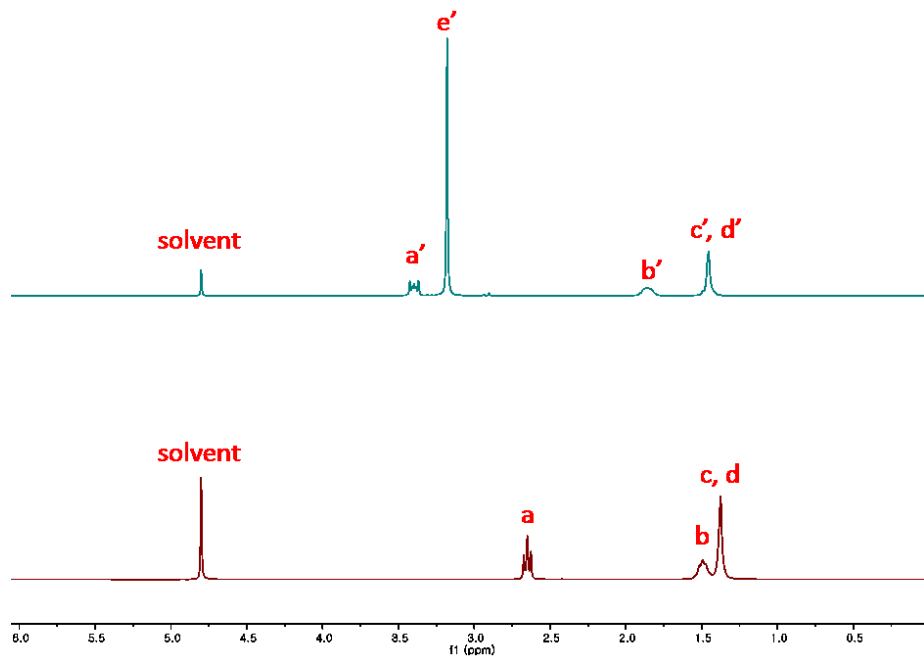

i)

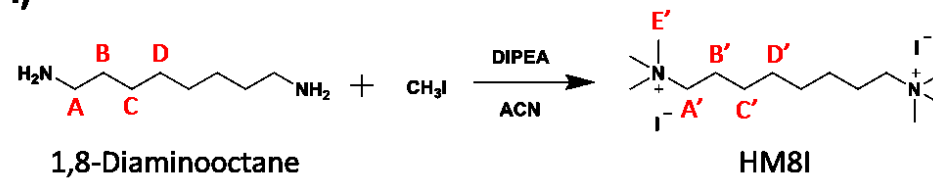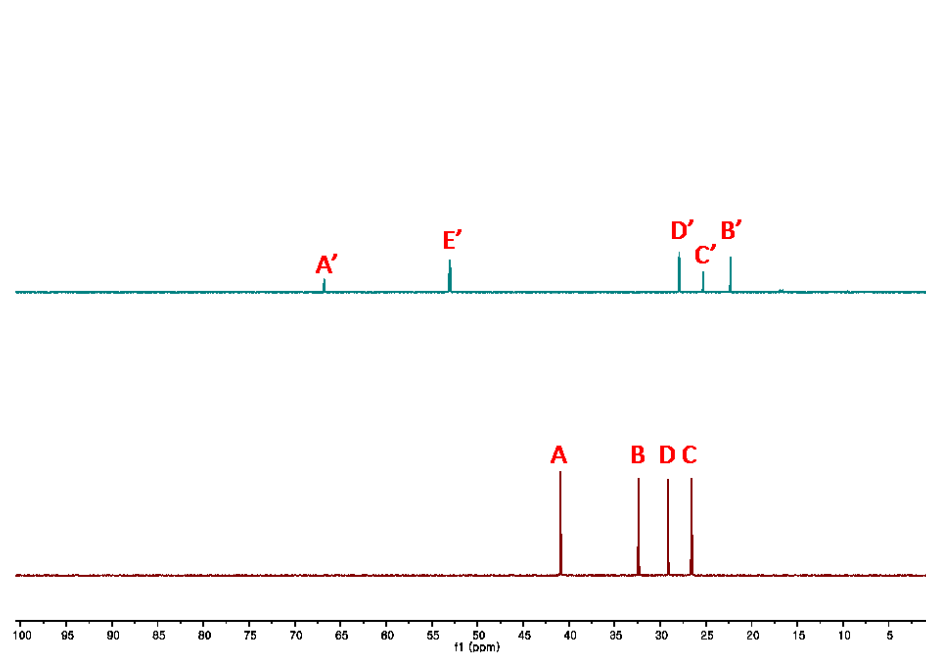

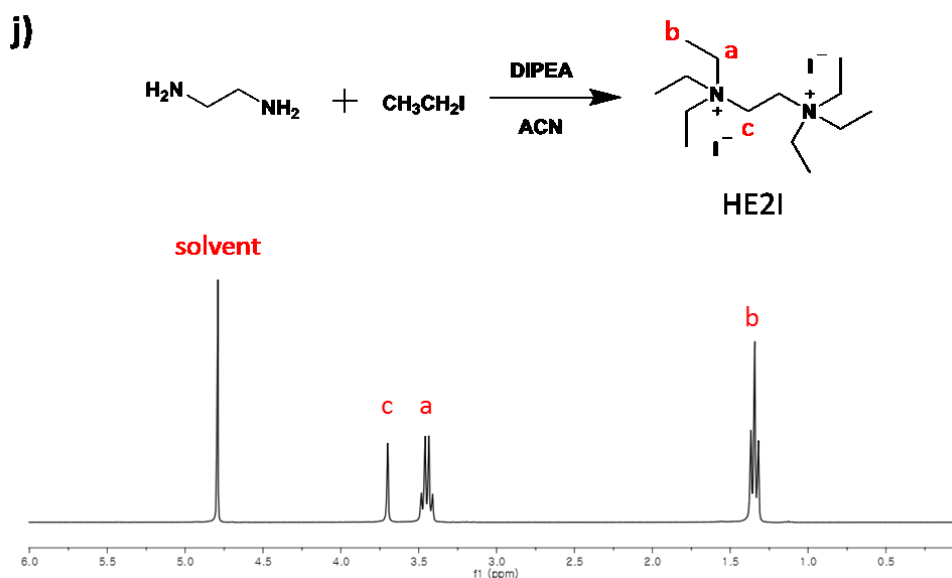

**Figure S1.** Synthetic scheme and  $^1\text{H}$  NMR spectra of a) 3MBAI ( $^1\text{H}$  NMR (300 MHz,  $\text{D}_2\text{O}$ ,  $\delta$ ): 3.90 (hept,  $J = 6.6$  Hz, 1H), 3.34 (q,  $J = 7.4$  Hz, 1H), 2.81 (s, 1H), 1.45 – 1.36 (m, 6H), 1.36 – 1.27 (m, 2H)), b) 3MOAI ( $^1\text{H}$  NMR (300 MHz,  $\text{D}_2\text{O}$ ,  $\delta$ ): 3.37 – 3.26 (m, 1H), 3.11 (s, 4H), 1.86 – 1.70 (m, 1H), 1.36 (d,  $J = 3.5$  Hz, 2H), 1.29 (s, 3H), 0.87 (dd,  $J = 8.8, 4.8$  Hz, 1H)), c) 3PEAI ( $^1\text{H}$  NMR (300 MHz,  $\text{D}_2\text{O}$ ,  $\delta$ ): 3.30 (q,  $J = 7.3$  Hz, 1H), 3.21 – 3.09 (m, 3H), 1.79 – 1.60 (m, 3H), 1.33 – 1.20 (m, 1H), 0.95 (t,  $J = 7.3$  Hz, 4H)), d) HM2I ( $^1\text{H}$  NMR (300 MHz,  $\text{D}_2\text{O}$ ,  $\delta$ ): 4.04 (s, 1H), 3.31 (s, 4H)), e) HM4I ( $^1\text{H}$  NMR (300 MHz,  $\text{D}_2\text{O}$ ,  $\delta$ ): 3.40 (d,  $J = 5.9$  Hz, 1H), 3.14 (s, 4H), 1.95 – 1.79 (m, 1H)), f)  $N,N,N',N'$ -tetramethyl-1,6-diaminohexane ( $^1\text{H}$  NMR (300 MHz,  $\text{D}_2\text{O}$ ,  $\delta$ ): 2.26 (dd,  $J = 17.1, 9.1$  Hz, 4H), 2.15 (s, 12H), 1.56 – 1.36 (m, 4H), 1.29 (d,  $J = 6.7$  Hz, 4H)) and HM6I ( $^1\text{H}$  NMR (300 MHz,  $\text{D}_2\text{O}$ ,  $\delta$ ): 3.41 – 3.28 (m, 1H), 3.12 (s, 4H), 1.83 (d,  $J = 2.7$  Hz, 1H), 1.54 – 1.36 (m, 1H)), g)  $N,N,N',N'$ -tetramethyl-1,6-diaminohexane ( $^{13}\text{C}$  NMR (75 MHz,  $\text{D}_2\text{O}$ ,  $\delta$ ): 58.68 (s), 43.93 (s), 26.74 (s), 26.33 (s)) and HM6I ( $^{13}\text{C}$  NMR (75 MHz,  $\text{D}_2\text{O}$ ,  $\delta$ ): 66.52 (s), 53.39 – 52.86 (m), 25.09 (s), 22.29 (s)), h) 1,8-diaminooctane ( $^1\text{H}$  NMR (300 MHz,  $\text{D}_2\text{O}$ ,  $\delta$ ): 2.65 (t,  $J = 7.0$  Hz, 4H), 1.57 – 1.43 (m, 4H), 1.38 (s, 8H)) and HM8I ( $^1\text{H}$  NMR (300 MHz,  $\text{D}_2\text{O}$ ,  $\delta$ ): 3.36 – 3.22 (m, 1H), 3.08 (s, 4H), 1.75 (d,  $J = 7.2$  Hz, 1H), 1.36 (s, 2H)), i) 1,8-diaminooctane ( $^{13}\text{C}$  NMR (75 MHz,  $\text{D}_2\text{O}$ ,  $\delta$ ): 40.91 (s), 32.39 (s), 29.13 (s), 26.57 (s)) and HM8I ( $^{13}\text{C}$  NMR (75 MHz,  $\text{D}_2\text{O}$ ,  $\delta$ ): 66.78 (s), 53.25 – 52.77 (m), 27.92 (s), 25.31 (s), 22.32 (s), 16.59 (s)), and j) HE2I ( $^1\text{H}$  NMR (300 MHz,  $\text{D}_2\text{O}$ ,  $\delta$ ): 3.70 (s, 1H), 3.45 (q,  $J = 7.2$  Hz, 3H), 1.34 (t,  $J = 7.2$  Hz, 4H)).

|                                 | Draw solute | Amine              | Iodoalkane | Base               |
|---------------------------------|-------------|--------------------|------------|--------------------|
| <b>Monoammonium iodide salt</b> | 3MBAI       | 5                  | 28         | 53                 |
|                                 | 3MOAI       | 5.0 <sup>a)</sup>  | 22         | 11.6 <sup>a)</sup> |
|                                 | 3PEAI       | 5                  | 6          | -                  |
| <b>Diammonium iodide salt</b>   | HM2I        | 15                 | 37         | -                  |
|                                 | HM4I        | 18                 | 37         | -                  |
|                                 | HM6I        | 21                 | 37         | -                  |
|                                 | HM8I        | 14.4 <sup>a)</sup> | 75         | 105                |
|                                 | HE2I        | 5                  | 72         | 78                 |

All units: mL (volume) except for <sup>a)</sup> g (weight).

5 **Table S1.** Amounts of reagents used for the synthesis of the ammonium iodide salts.

10

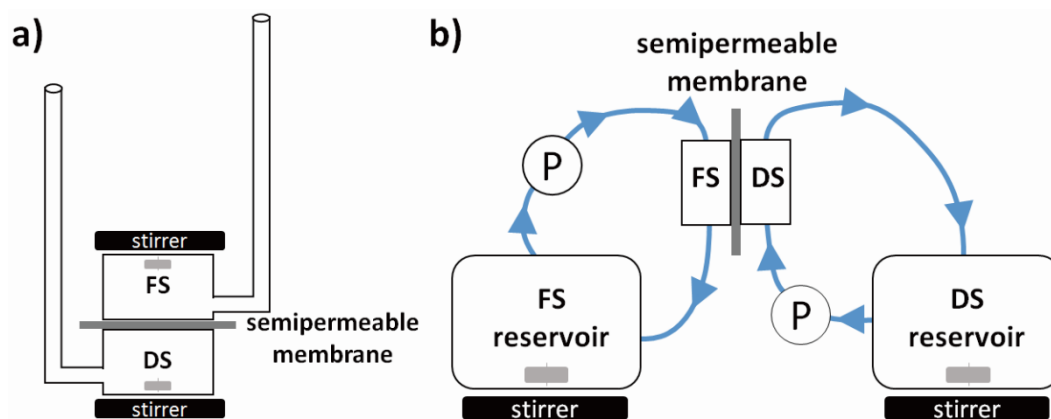

**Figure S2.** Schematic illustration of a) handmade U-shape glass tubes for small-scale analysis (dead-end type) and b) a cross-flow instrument for large-scale analysis.

15

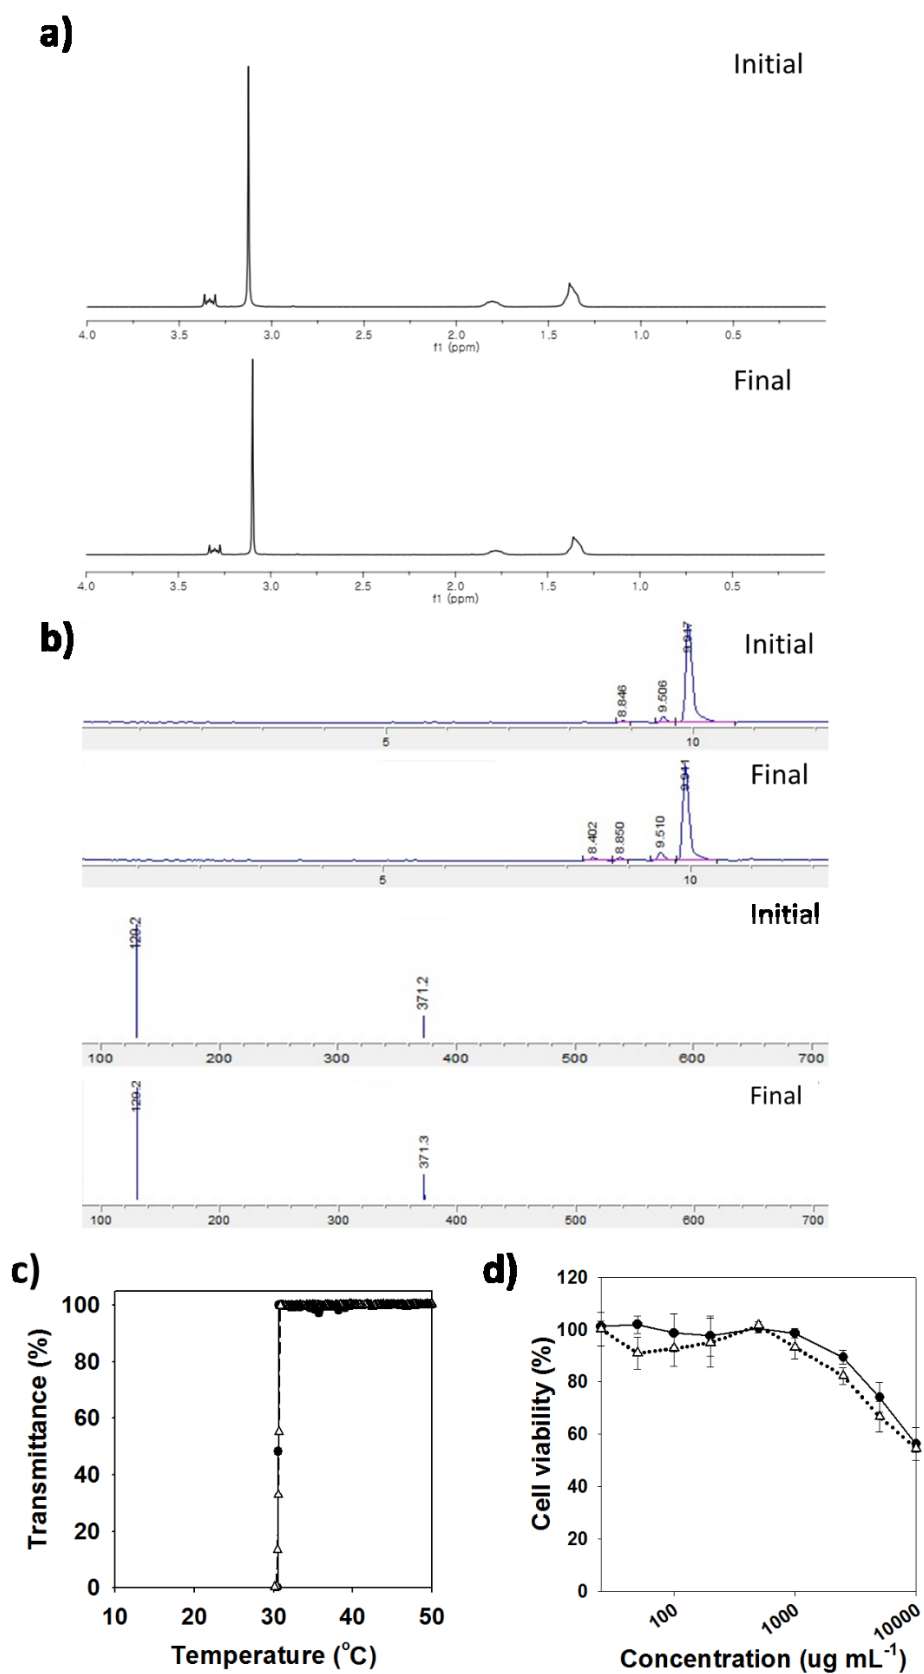

**Figure S3.** a)  $^1\text{H}$  NMR spectra of HM10I before and after stability test. b) LC/MS spectra of HM10I before and after stability test. c) The UCST phase transition of aqueous solution of 40 wt% HM10I (initial ( $\bullet$ , solid line) and after stability test ( $\Delta$ , dash line)). d) Viability of HeLa cells treated with HM8I ( $\bullet$ , solid line) and HM10I ( $\Delta$ , dotted line). Each data point represents the average value of five experiments ( $\pm$ S.D.).
